# Supplementary material for: Exciton–phonon interaction in quasi-two dimensional layered (PEA)2(CsPbBr3)n−1PbBr4 perovskite
Source: Royal Society of Chemistry journal article supplement (doi:10.1039/c9nr06834a), 2019-01-01
Supplement: c9nr06834a1.pdf [file c9nr06834a1.pdf]

## Supplementary Information

Manuscript: NR-ART-08-2019-006834

Title: “Exciton-Phonon interaction in quasi-two dimensional layered  $(\text{PEA})_2(\text{CsPbBr}_3)_{n-1}\text{PbBr}_4$  perovskite”

Authors: Hao Long<sup>a\*</sup>, Xiang Peng<sup>a</sup>, Jianxun Lu<sup>b</sup>, Kebin Lin<sup>b</sup>, Liqiang Xie<sup>b</sup>, Baoping Zhang<sup>a</sup>, Leiying Ying<sup>a</sup> and Zhanhua Wei<sup>b\*</sup>

\*Corresponding emails: [longhao@xmu.edu.cn](mailto:longhao@xmu.edu.cn); [weizhanhua@hqu.edu.cn](mailto:weizhanhua@hqu.edu.cn)

### PXRD data and analyzation:

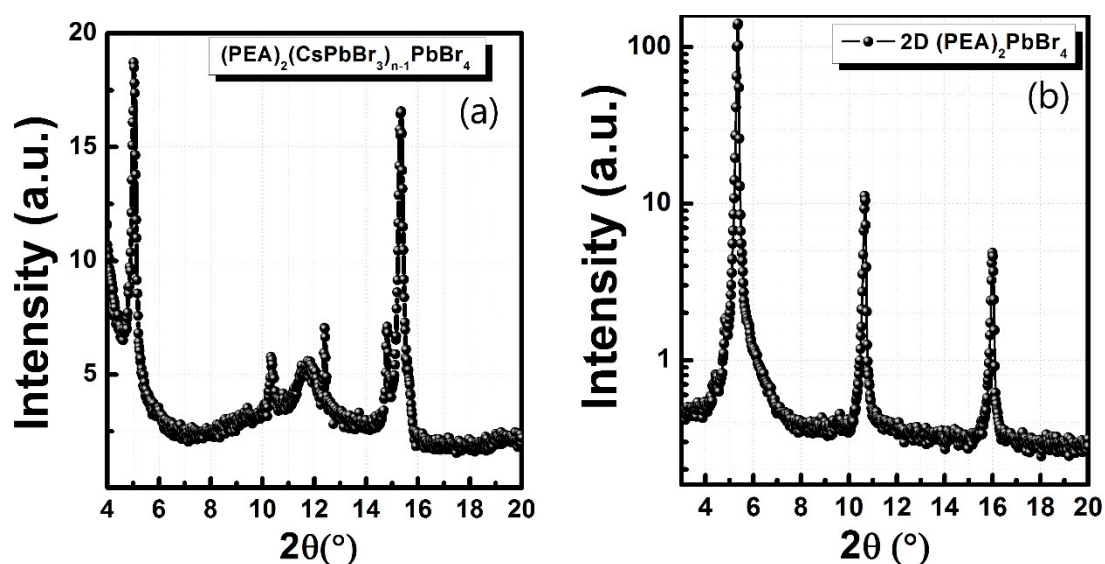

Fig.S.1: Low angle PXRD of (a) quasi-2D mixed phase  $(\text{PEA})_2(\text{CsPbBr}_3)_{n-1}\text{PbBr}_4$ , (b) pure phase 2D  $(\text{PEA})_2\text{PbBr}_4$  perovskite showing formation of 2D  $\text{PbBr}_4$  layer.

Three primary PXRD peaks were observed in quasi-2D mixed phase  $(\text{PEA})_2(\text{CsPbBr}_3)_{n-1}\text{PbBr}_4$  and pure phase 2D  $(\text{PEA})_2\text{PbBr}_4$  perovskite. These three peaks came from (002), (004) and (006) diffraction of  $\text{PbBr}_4$  octahedrons [1], which were direct proof of 2D structure formation in our samples.

## TRPL at room temperature:

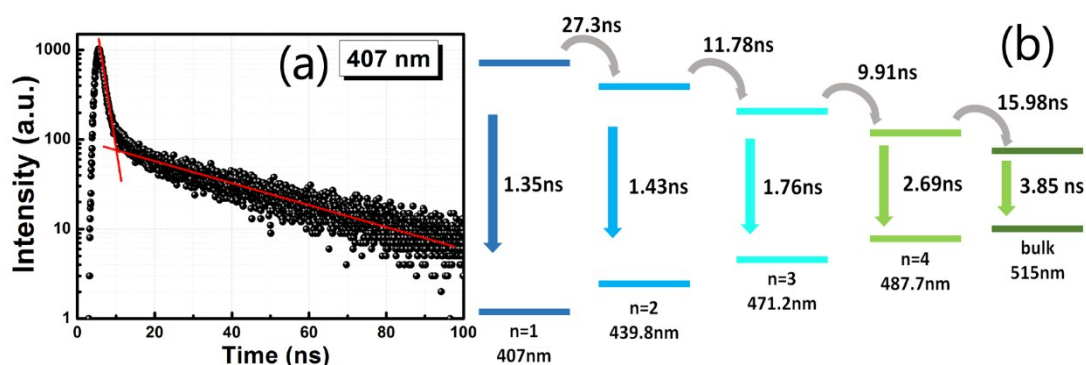

Fig.S.2: (a) TRPL of quasi-2D  $(\text{PEA})_2(\text{CsPbBr}_3)_{n-1}\text{PbBr}_4$  perovskite at 407 nm ( $n=1$  energy level); (b) carriers' transfer and recombination diagram derived by TRPL

The room temperature time resolved PL (TRPL) spectrums were taken at the peak wavelengths corresponding to the  $n=1-4$  and bulk  $(\text{PEA})_2(\text{CsPbBr}_3)_{n-1}\text{PbBr}_4$  perovskite. Each TRPL could be perfectly fitted by double exponential decay models with one slow channel (10ns-30ns) and another fast channel (1ns-3ns), as shown in Fig.S.2(a). The fast channel was ascribed with the carrier recombination process. The slow channel could be ascribed with the energy funnel process. Because the recombination process was prompt in our quasi-2D material, five distinct PL peaks can be detected by the integrated PL measurements. Therefore, we concluded that the recombination process dominated in our quasi-2D samples, while energy funnel was not the dominating factor.

## PL intensity quenching fitting:

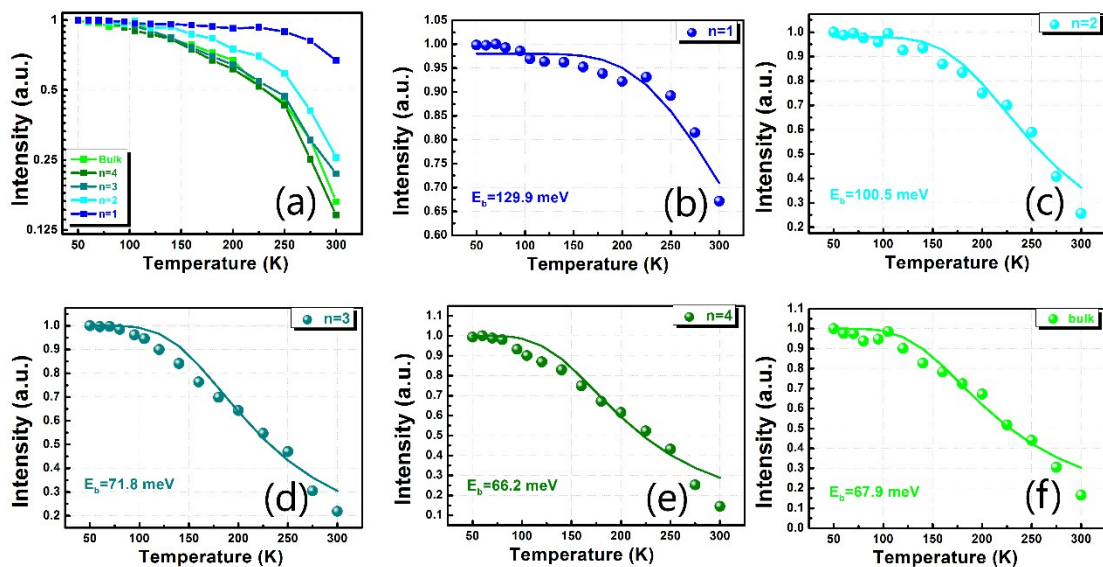

Fig.S.3: Normalized PL intensities of  $(\text{PEA})_2(\text{CsPbBr}_3)_{n-1}\text{PbBr}_4$  with various  $n$  layer numbers.

The intensity quenching of  $(\text{PEA})_2(\text{CsPbBr}_3)_{n-1}\text{PbBr}_4$  was fitted by equation[1]:

$$I(T) = \frac{I(0)}{(D \cdot \exp\left(-\frac{E_b}{kT}\right) + 1)} \quad (1)$$

where  $D$  represents the non-radiative density,  $E_b$  was the exciton binding energies.

## TDPL of pure phase 2D $(\text{PEA})_2\text{PbBr}_4$ :

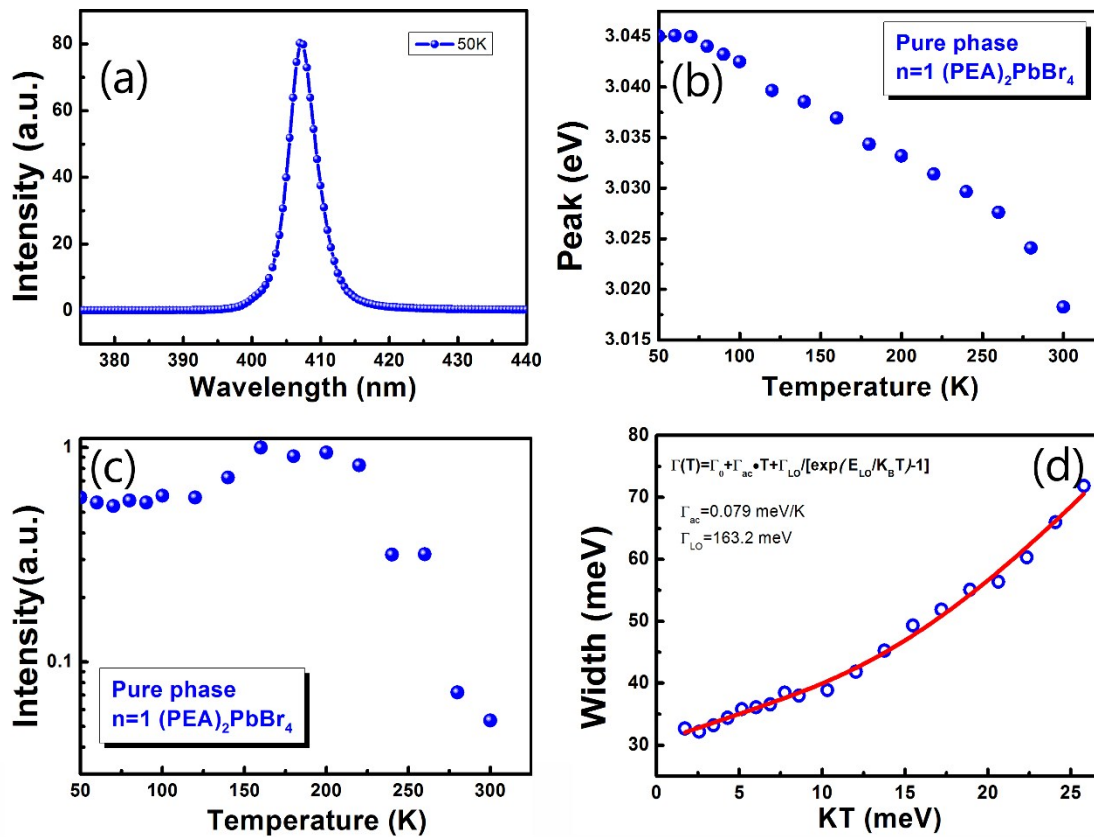

Fig.S.4: (a) photoluminescence (PL) spectrum of pure phase 2D  $(\text{PEA})_2\text{PbBr}_4$  perovskite at 50K; (b) monotonous blueshift of PL peak with temperature; (c) intensity quenching with temperature; (d) width broadening by temperature by exciton-phonon coupling.

## References:

- [1]. Liang, Y.; Shang, Q.; Wei, Q.; Zhao, L.; Liu, Z.; Shi, J.; Zhong, Y.; Chen, J.; Gao, Y.; Li, M.; et al. Adv. Mater. 2019, 1903030.
- [2]. Long, H.; Peng, X.; Lin, K.; Xie, L.; Lu, J.; Zhang, B.; Ying, L.; Wei, Z. Applied Physics Express 2019, 12 (5), 052003.
